# Supplementary material for: Genome-Wide Identification of C2H2 ZFPs and Functional Analysis of BRZAT12 under Low-Temperature Stress in Winter Rapeseed (Brassica rapa)
Source: MDPI journal article supplement (doi:10.3390/ijms232012218), 2022-10-13
Supplement: s1 [file s1]

**Table S1 Primer sequence information of C2H2 gene family.**

| Gene ID        | Primer sequence 5'-3'     | Primer sequence 3'-5'     |
|----------------|---------------------------|---------------------------|
| Bra000245      | GTGTACCGCCTTCCACGTCAAC    | GTCGGCTCCCTACTCTCTTGGTG   |
| Bra001752      | TGTCAAGTACGGTTTCGGAAGAACG | ACTGGGTCGTGATGAAGGCTGAG   |
| Bra002528      | GACACATGAGGAGACACAGGAACG  | CAACGCTGCCTCCGACAGTAAC    |
| Bra004312      | ACTTGCGTCGGTGAACCCATTG    | TGATCCAAACGCTGCCGTGAAG    |
| Bra004660      | AGTCCTTTAGGTTTGTGGCGTGTAC | GCGGCTCCTTACTCTCCTGGTC    |
| Bra006230      | ATGATGGTGGGTGGTGGTGGTG    | AGCTGTGGCTCGTCTTCAATGTAG  |
| Bra006691      | GTTATTGCCGGAGCCGACGATG    | CTCAACCATCCCCAAACTCAGATCC |
| Bra016900      | AACGGAAGTCCTTTGGGTTTGTGG  | CGACTCTTTACGCTCCTGCTCATG  |
| Bra020284      | CGTTGGTTACAAGAGCGTTATTGCC | ACAAGCCACCCTCTTCCCACTAC   |
| Bra033724      | TTGCGTCTGCGATGGATGAACTAC  | CCTCCTCCACCACCTTCTCCTC    |
| $\beta$ -actin | TGTGCCAATCTACGAGGGTTT     | TTCCCCGCTCGGCTGTTGT       |
